# Supplementary material for: Partial migration in diadromous fishes drives the allocation of subsidies across the freshwater-marine ecotone
Source: publisher site journal article supplement (doi:10.1515/ami-2020-0108), 2021-01-01
Supplement: Supplementary file 2 [file ami-2020-0108_SM.docx]

**Supplementary material**

**B**

**A**

**Fig. S1. A** Linear relationship between standard length (mm) and otolith core-to-edge (mm) (R2=0.76, p<10-15) in *Paraliza ordensis*. **B** Log-linear relationship between weight (g) and otolith core-to-edge (mm) (R2=0.76, p<10-15) in *Paraliza ordensis*.

**Fig. S2.** Von Bertalanffy growth curve of standard length (mm) against age (years) (R2=0.71) in *Paraliza ordensis*. Gray points show empirical data, based on otolith ageing. Dashed line shows the limit size in the model (L=500.36).

**Fig. S3.** Log-linear relationship between weight (g) and standard length (mm) (R2=0.99, p<10-15) in *Paraliza ordensis*.
